# Supplementary material for: High-throughput sequencing reveals extraordinary fluidity of miRNA, piRNA, and siRNA pathways in nematodes
Source: HighWire-hosted journal article supplement (doi:10.1101/gr.149112.112), 2013-01-30
Supplement: SuppLegends.docx [file SuppLegends.docx]

**Supplementary Figure Legends**

**Fig. S1. Phylogeny of Argonaute genes.**

Genes from different species are color-coded according to the key. Different subfamilies are indicated by colored branches. *H*, *H. sapiens*; *D*, *D. melanogaster*; *Cel*, *C. elegans*; *Cbr, C. briggsae*; *Cre,* *C. remanei*; and *Cbn, C. brenneri*. The three major clades, PIWI, AGO and WAGO, are indicated.

**Fig. S2. The miR-62 mirtron is highly conserved.**

(A) The miR-62 mature sequences (in purple) are identical in all four nematode species. Nucleotides at other positions of miR-62 mirtron that are different between species are shown in grey. (B) The level of conservation of miR-62 mirtron is substantially higher than other introns in *ugt-50*.

**Fig. S3. The upstream large and small motifs and distance between them are highly conserved in all four nematode species.**

(A) The large and small motifs upstream of piRNA loci, plotted as a sequence logo (Crooks et al. 2004), are nearly identical in all four species. (B) The spacer between large and small motifs is predominately 19-21 nt in all four species.

**Fig. S4. piRNA saturation analysis.**

The percentage of the total number of piRNAs identified in each library using a random subset of 10-100% of all sequencing reads. *C. elegans* miRNAs are shown for comparison.

**Fig. S5. Upstream motif of hermaphrodite/female- or male-enriched piRNAs.**

Sequence logos (Crooks et al. 2004) display nucleotide conservation in the large motifs upstream of hermaphrodite/female- or male-enriched piRNAs loci. Positions that have a substantially different weight matrix between hermaphrodites/females and males are colored.
