# Supplementary material for: High-throughput sequencing reveals extraordinary fluidity of miRNA, piRNA, and siRNA pathways in nematodes
Source: HighWire-hosted journal article supplement (doi:10.1101/gr.149112.112), 2013-01-30
Supplement: TableS1.xlsx [file TableS1.xlsx]

## Sheet: Table S1
Table S1. Statistics of deep-sequencing libraries
Sepecies	C. elegans	C. briggsae	C. remanei	C. brenneri	C. elegans	C. briggsae	C. remanei	C. brenneri	C. elegans	C. briggsae	C. remanei	C. brenneri
Stage	gravid hermaphrodites	gravid hermaphrodites	adult female and male	adult female and male	embryo	embryo	embryo	embryo	adult male	adult male	adult male	adult male
Processed	34579695	30560318	26482627	24237563	13312103	19625956	21919024	21201894	15741319	13764850	17123676	16692718
Parsed	34025531	30068732	26055164	23886588	12265411	18609904	20779493	20596136	10858229	10722024	11426599	13797633
%	98.3974	98.3914	98.3859	98.5519	92.1373	94.8229	94.8012	97.1429	68.9792	77.8942	66.7298	82.6566
Mapped	25386959	22592180	20101419	18483730	9256137	14037744	15451636	16214503	4207229	4803972	5944062	8285220
%	74.6115	75.1351	77.1495	77.3812	75.4654	75.4316	74.36	78.7259	38.7469	44.8047	52.0195	60.0481
Unique	3895075	3382017	4099199	4498439	1504617	1898582	3177744	3542786	846968	849652	1041578	1915893
%	15.3428	14.9699	20.3926	24.3373	16.2553	13.5248	20.5657	21.8495	20.1313	17.6864	17.523	23.1242
