# Supplementary material for: High-throughput sequencing reveals extraordinary fluidity of miRNA, piRNA, and siRNA pathways in nematodes
Source: HighWire-hosted journal article supplement (doi:10.1101/gr.149112.112), 2013-01-30
Supplement: TableS2.xlsx [file TableS2.xlsx]

## Sheet: Table S2
Table S2. Known and new identified miRNAs
	C. elegans	C. briggsae	C. remanei	C. brenneri
Known (miRBase)	223	127	118	N/A
Present in the library	147	113	99	N/A
Known identified	108 (73%)	88 (78%)	96 (97%)	N/A
New identified	0	31	47	187
