# Supplementary material for: High-throughput sequencing reveals extraordinary fluidity of miRNA, piRNA, and siRNA pathways in nematodes
Source: HighWire-hosted journal article supplement (doi:10.1101/gr.149112.112), 2013-01-30
Supplement: TableS3.xlsx [file TableS3.xlsx]

## Sheet: TableS3
Table S3. List of all new identified miRNAs
Species	Mature sequence	Seed	Precursor sequence	Precursor coordinate
Cbr	ugaggaccaguagaaugcuguag	gaggac	acaguauucucuguagccuuaucaauuuucacuguguaaaauugaggaccaguagaaugcuguag	chrV:3694985..3695050:-
Cbr	uaacccaaucacgaaaauggcuga	aaccca	agccacuucgguugugguuauacaaacagaaguugauauaacccaaucacgaaaauggcuga	chrX:11135471..11135533:-
Cbr	uaacccaaucacgaaaauggcuga	aaccca	agccacuucgguugugguuauacaaacagaaguugauauaacccaaucacgaaaauggcuga	chrX:11141279..11141341:+
Cbr	uaaccagguccacaucugcauu	aaccag	ugccgaugucggcuuggguuguaccaucucgaaauccggcuauaaccagguccacaucugcauu	chrX:15378480..15378544:+
Cbr	ugacaugccauaauuucuuacag	gacaug	guaaggauuauugcuugucucacauaaaaaucucaugugacaugccauaauuucuuacag	chrX:1930984..1931044:+
Cbr	ccauccgaaauuugugauuga	cauccg	aguugcaaauaucgugguggcauuacaaguagucuugccauccgaaauuugugauuga	chrX:16161882..16161940:+
Cbr	ccauccgacauuugugguuga	cauccg	agucacaaauaucgugauggcauugaaaggcaucauugccauccgacauuugugguuga	chrX:20377604..20377663:+
Cbr	ugagauacagcggucguuugauacu	gagaua	ugagauacagcggucguuugauacucagcgauuuugucucagcuucaaacgcauguaucuugac	chrII:4243495..4243559:-
Cbr	ugagauacugcucaucucaga	gagaua	ugaggugagcacguaccucccuaguaauagacagugugcuagugagauacugcucaucucaga	chrI:15397130..15397193:+
Cbr	uggaauccucucuguuugcuuga	ggaauc	ugguaaacggaguagugguuccugaaaaaugauuucuucuggaauccucucuguuugcuuga	chrX:14869079..14869141:-
Cbr	ucuagaaucccuucaggcguuacu	cuagaa	ucuagaaucccuucaggcguuacucaccuaguguugugaguaacguugaggaauuuuagaac	chrX:20533902..20533964:+
Cbr	aguugcaaauaucgugguggca	guugca	aguugcaaauaucgugguggcauuacauguugucuugccauccgucauuugugguuga	chrX:20312033..20312091:+
Cbr	aaaaccgaucaauaagcuuacag	aaaccg	guaaguuguugauuguguuucuucccauauucaaaaugaggaaaaccgaucaauaagcuuacag	chrX:13128472..13128536:+
Cbr	agcugcaaaagucgugguggc	gcugca	agcugcaaaagucgugguggcaucacaaguugucuugccauccgacauuugugguuga	chrX:10872909..10872967:+
Cbr	uggaaauggagaaaucuuacag	ggaaau	guaagauuccuucauuucauccaaaaaguugguugaauuauuuggaaauggagaaaucuuacag	chrX:2057130..2057194:+
Cbr	aggucuuaaagguugguggcc	ggucuu	aggucuuaaagguugguggccuagaaaaaucaacuugccaaaguuaggccaccauuuguuaaggccuag	chrV:2734902..2734971:+
Cbr	aaucgguauccggacccucuggu	aucggu	aagagauuccugagaccugauucuagaagcuuccccuagaaucgguauccggacccucuggu	chrIV:15802497..15802559:+
Cbr	uucgaaaugaucuuuaaaagu	ucgaaa	uucgaaaugaucuuuaaaagugggggaaaggagauuuuucggagauuuuuuggagcc	chrIV:1964277..1964334:+
Cbr	ugagguauuguaaaagcuuac	gaggua	aagcuugcacgaucaccucucaaccagcacaaugaguugagguauuguaaaagcuuac	chrX:15669653..15669711:-
Cbr	ugagguaggcauguagcccgaaa	gaggua	ucggguuucaucgucgcccucgacacucacagcgaaguguugagguaggcauguagcccgaaa	chrX:11722778..11722841:+
Cbr	ugagguaggcauguagcccgaaa	gaggua	ucggguuucaucgucgcccucgacacucacagcgaaguguugagguaggcauguagcccgaaa	chrX:11731112..11731175:+
Cbr	ugagguagacguuuagcccgaaa	gaggua	ccgggacugaucguagccuucaacacucgaagcgaaguguugagguagacguuuagcccgaaa	chrIII:10733442..10733505:-
Cbr	ugagguagacguuuagcccgaaa	gaggua	ccgggacugaucguagccuucaacacucgaagcgaaguguugagguagacguuuagcccgaaa	chrX:11718111..11718174:+
Cbr	uacccguuaacucgaagaaagug	acccgu	uacccguuaacucgaagaaaguguuaagcaucaucuuucacacuuucucgguugacggguacc	chrI:14505054..14505117:-
Cbr	caugacacacuggcuggucugga	augaca	caugacacacuggcuggucuggaaugauuucggcuccuccgguccgcccgagugccacgaa	chrIII:869359..869420:-
Cbr	uggaauggcuuacgagaccaac	ggaaug	uggaauggcuuacgagaccaacaaugagauuaucguugaccucggagucaagccaac	chrX:1390881..1390938:-
Cbr	ugacuagagugcugagcucucc	gacuag	agaguucagacccuggugaccuacagcaguagcaugaggugacuagagugcugagcucucc	chrX:10093683..10093744:+
Cbr	uaucacagccagcuuugaugugc	aucaca	ccgucaaagugguguguguuaugccgcauaagugaacuucuuuucggaaguuuugguucauaucacagccagcuuugaugugc	chrI:2714103..2714186:-
Cbr	uaagugaauucucuaccuucggu	aaguga	agaaguuagaguauuuucucuuagccaacacauugauucgcuaagugaauucucuaccuucggu	chrX:4421255..4421319:+
Cbr	uaaggcacgccuaacucugucu	aaggca	acagaguuugucguugcguuuaauuaggaacagaaccaaauuaaggcacgccuaacucugucu	chrX:1605242..1605305:-
Cbr	uaaggcacuuccaagccguac	aaggca	acggcauuggcagugaccuuaauagagaacagucaacucauuaaggcacuuccaagccguac	chrX:1609140..1609202:-
Cre	ugaggaccuguagaguuccguuc	gaggac	acggcacucgcaguuuucucaacacucaagacguagcguugaggaccuguagaguuccguuc	Crem_Contig0:2909124..2909186:+
Cre	gagcugcccucggauagacucu	agcugc	aguuuauccaggaaagcuaucggccgaguacuuagaaccgagcugcccucggauagacucu	Crem_Contig6:1917110..1917171:-
Cre	uaaccaggcucauaguaguucu	aaccag	ugcuacuaucagcuuugguuauauacauucccacaacuuauaaccaggcucauaguaguucu	Crem_Contig93:217778..217840:-
Cre	uagccaaugucacuacugucaug	agccaa	uagccaaugucacuacugucauguaaaugaaaagcucaugacagugguacauugucuacu	Crem_Contig4:460765..460825:+
Cre	auugguaucccugucaaggucu	uuggua	accuggccaggcauuccaacuguccauccaaguacuuuaucggacaauugguaucccugucaaggucu	Crem_Contig13:949738..949806:-
Cre	uuuugauuugacagaacuagc	uuugau	guuucucaaguuugaucucaaguaagacuuguuguuucuuacacuuuugauuugacagaacuagc	Crem_Contig129:99305..99370:-
Cre	ugggauccauuccaauuggcucu	gggauc	agcccauuggauugauccgacacaaaauaaugaugugggauccauuccaauuggcucu	Crem_Contig423:14648..14706:+
Cre	ugggauccauuccaauuggcucu	gggauc	agcccauuggauugauccgacacaaaauaaugaugugggauccauuccaauuggcucu	Crem_Contig423:18484..18542:+
Cre	ugggauccauuccaauuggcucu	gggauc	agcccauuggauugauccgacacaaaauaaugaugugggauccauuccaauuggcucu	Crem_Contig494:17030..17088:-
Cre	ugggauccauuccaauuggcucu	gggauc	agcccaucggauugauccgacacaaaauaaugaugugggauccauuccaauuggcucu	Crem_Contig132:257469..257527:-
Cre	uauacuugacgugauuucggc	auacuu	uuucaucagaacgaguacacuucuaaacaaguauacuugacgugauuucggc	Crem_Contig105:114254..114306:+
Cre	guaaguuuuaauguugagcuaga	uaaguu	guaaguuuuaauguugagcuagaaaaccccccguuuuuucuagcucacacacuaaaacuuucag	Crem_Contig33:297572..297636:-
Cre	ugagauugacccuucaguaguuacu	gagauu	ugagauugacccuucaguaguuacuuaugcauaauacaaguuacuacaagcggaaucucauc	Crem_Contig16:1043371..1043433:+
Cre	uguugagcuaaccguucugaga	guugag	acagaacgguucaucuacaagauccgacaguaucugauguugagcuaaccguucugaga	Crem_Contig86:271554..271613:-
Cre	cgauguucaguuauggauacgu	gauguu	cgauguucaguuauggauacguggaaaugaagaagauauuggaaacguaugccuaacugaguaucauc	Crem_Contig84:278840..278908:+
Cre	ucuaccaacugcuccauucgu	cuacca	agguggauagguuguguagauucacggauauuaugauauguaaucuaccaacugcuccauucgu	Crem_Contig56:134246..134310:+
Cre	ucuaccaacugcuccauucgu	cuacca	agguggauagguuguguagauucacagguaugaugagauguaaucuaccaacugcuccauucgu	Crem_Contig119:300233..300297:-
Cre	gggauaugaaaucacgugaaca	ggauau	gggauaugaaaucacgugaacagcguucugaguacaugucuguacccguaaucuucauaauccaag	Crem_Contig43:489070..489136:+
Cre	uacauacgaacgggugaguucc	acauac	agcucagucuuucgcguguaucugaaucauaguuugauacauacgaacgggugaguucc	Crem_Contig24:1103396..1103455:+
Cre	uacacguaagcugguuuagcuca	acacgu	agcucaaccguuugcguguaucuauaauugaguaugauacacguaagcugguuuagcuca	Crem_Contig24:1101836..1101896:+
Cre	aacguuucauuucuguacaaaacu	acguuu	aacguuucauuucuguacaaaacuuaucaagaugcaucaguuuguacuaauggaacgaucu	Crem_Contig22:614482..614543:+
Cre	uguaauuccguuugguggauacu	guaauu	uguaauuccguuugguggauacuaauaccaugaauaaguaucuacuggcgggauuucacu	Crem_Contig16:1071092..1071152:+
Cre	uugaacaauccauugaagcau	ugaaca	uugaacaauccauugaagcauagagguaucaaucuaaaaguaauccggcuuucgauugccaacugugaacaaaagaauuguacugu	Crem_Contig114:186167..186253:-
Cre	auacuggcccccaaauuuucgcu	uacugg	cgggaguuucguggccugaaugcgugaacgcuugugcuuuagcauacuggcccccaaauuuucgcu	Crem_Contig0:181527..181593:-
Cre	cugggaacuuguagauugaugaca	ugggaa	acaucacuaccagguuucacagcguuucaauggaaacgcugggaacuuguagauugaugaca	Crem_Contig0:2911515..2911577:+
Cre	ugacaugcggcaauuuuuacag	gacaug	guaagaauugcagucugucccacaagaauuuaaugugacaugcggcaauuuuuacag	Crem_Contig25:342515..342572:+
Cre	aucaucgaucauguaugcuguc	ucaucg	cgguuuacaugguagaagauaucaguauaaaaaauagauaucaucgaucauguaugcuguc	Crem_Contig31:151833..151894:+
Cre	ugagguaggccgaguagaagguaa	gaggua	uaccucuucugagcuggaccucaccacuuauugcacaguguugagguaggccgaguagaagguaa	Crem_Contig0:1721325..1721390:+
Cre	ugagguaucaaacaaucaccuga	gaggua	ugagguaucaaacaaucaccugagacaaaguucauaacucaggucgauuuaagauaccucga	Crem_Contig22:621028..621090:+
Cre	uacccguaaugcuuccgcugag	acccgu	uggcgaauccauuccggguguaccucacagcaauccugacgguacccguaaugcuuccgcugag	Crem_Contig43:489346..489410:+
Cre	uacccguagcuccuauccauguu	acccgu	uacccguagcuccuauccauguuacuagcagauagagugaacauggaaguugguacaggugua	Crem_Contig20:698365..698428:-
Cre	uacccguagcuccuauccauguu	acccgu	uacccguagcuccuauccauguuacuagcagauagagugaacauggaaguugguacaggugua	Crem_Contig1341:3371..3434:+
Cre	ugagaucauucgaugagcccaga	gagauc	ucuggcuuauugauuggucuccuaccacuuuuuggauaugagaucauucgaugagcccaga	Crem_Contig279:61187..61248:+
Cre	agagaucauucgacagguccaa	gagauc	gacuuguggucuggucuccuaccguuuuauagauaagagaucauucgacagguccaa	Crem_Contig469:12332..12389:-
Cre	caugacaccuacucgcucgacgucg	augaca	caugacaccuacucgcucgacgucguaucgcugaaacgaccggguggugagguggcauacc	Crem_Contig41:71834..71895:+
Cre	uggcaagaauugcgcaggcggu	ggcaag	agccuucucacuucuugcccacaccucucaaucaaauggauguggcaagaauugcgcaggcggu	Crem_Contig259:50201..50265:+
Cre	uuuguacugggcauagguuaccucu	uuguac	agguccuauccuccaguccaaaacuaaucauugagaauuuaguuuguacugggcauagguuaccucu	Crem_Contig22:612520..612587:+
Cre	uggcaguucgcgagcuucgaga	ggcagu	acgaagcuccccacacugcgacucgucuauugaagaaauaguggcaguucgcgagcuucgaga	Crem_Contig22:611624..611687:-
Cre	uuaaguaguggugccgcucuua	uaagua	uuaaguaguggugccgcucuuauuagaauccagaauaauaagagucgcucacugcuuauc	Crem_Contig15:664303..664363:+
Cre	uaaggcaccaaaauucuguga	aaggca	acgggguuuugugucgccuuauuuugguuauaagaauaauaaggcaccaaaauucuguga	Crem_Contig45:598108..598168:-
Cre	acuuggucgacaaucuaauauu	cuuggu	acuuggucgacaaucuaauauuaucgguucugccagaagauaguauuaguugugcgaccaggaga	Crem_Contig0:2006544..2006609:-
Cre	uuauugcucgagaauacccuu	uauugc	cgguauucgacggugaauaauaaaaaugacauugcgacucauucuauuauugcucgagaauacccuu	Crem_Contig218:7157..7224:+
Cre	uacagaagcguggauuuucaca	acagaa	uacagaagcguggauuuucacauaccaaucggaagugucugugcaaaucuaucgcaacuguaca	Crem_Contig15:998483..998547:-
Cre	ucacugguuuuccucugacuaau	cacugg	ggucagagcaacacgcagucacauaaguuucugaaaugugucacugguuuuccucugacuaau	Crem_Contig0:4288249..4288312:-
Cre	ugaaagacuauucgggcuggga	gaaaga	acaguuccaacaguucuuuccacacucacaaagaagcguugaaagacuauucgggcuggga	Crem_Contig0:3141113..3141174:+
Cre	ugaaagacugaagaguacuguga	gaaaga	acaguuuucucagggcuuugaacgcucacugaaaaacguugaaagacugaagaguacuguga	Crem_Contig0:2910105..2910167:+
Cre	uagccaaugucacuacugucaug	agccaa	uagccaaugucacuacugucauguaaaugaaaagcucaugacagugguacauugucuacu	Crem_Contig4:460765..460825:+
Cbn	ugaggaccguuuucuaacuguga	gaggac	acaggagucaauggagccucaauuaucauuaugaauaauugaggaccguuuucuaacuguga	Cbre_Contig26:369655..369717:+
Cbn	ugaggaccguuuucuaacuguga	gaggac	acaggagucaauggagccucaauuaucauuaugaauaauugaggaccguuuucuaacuguga	Cbre_Contig570:16961..17023:+
Cbn	gagcugcccugggauagacucu	agcugc	aguuuauccaggaaagcuaucggacugacguuugguaccgagcugcccugggauagacucu	Cbre_Contig376:51584..51645:-
Cbn	gagcugcccugggauagacucu	agcugc	aguuuauccaggaaagcuaucggacugacauuuaguaccgagcugcccugggauagacucu	Cbre_Contig36:704818..704879:+
Cbn	uaacccaacugaaaauagcugga	aaccca	cgcuaucuucauguggggguuuacauaaauuccaaaguauguaacccaacugaaaauagcugga	Cbre_Contig89:65102..65166:-
Cbn	uaaccagguugauaauugcac	aaccag	gcuuuucucaaccuugguuguaaauaaucaugaaauguuuauaaccagguugauaauugcac	Cbre_Contig34:774890..774952:-
Cbn	agaucuacacucugaacuucuacu	gaucua	agaucuacacucugaacuucuacuaacaaauggaaaguucaguaggagucaggguuagaucucg	Cbre_Contig205:210681..210745:+
Cbn	agaucuacacucugaacuucuacu	gaucua	agaucuacacucugaacuucuacuaacaaaugaaaaguucaguaggagucaggguuagaucucg	Cbre_Contig91:357431..357495:-
Cbn	uguagucucuaauguucgaucaga	guaguc	uguagucucuaauguucgaucagaaacgaaucacgaaaugaguucugguuguccuagaaacuacgaa	Cbre_Contig205:159198..159265:-
Cbn	uguagucucuaauguucgaucaga	guaguc	uguagucucuaauguucgaucagaaacaaaucacgaaaugaguucugguuguccuagaaacuacgaa	Cbre_Contig91:412844..412911:-
Cbn	guaaguccuagaucuaucuucc	uaaguc	guaaguccuagaucuaucuuccucgcuuuuaguuauuggaagaaagagcuaugauuuacag	Cbre_Contig305:44673..44734:-
Cbn	guaaguccuagaucuaucuucc	uaaguc	guaaguccuagaucuaucuuccucgcuuuuaguuauuggaagaaagagcuaugauuuacag	Cbre_Contig1313:3604..3665:+
Cbn	uaaaacacucaaguuggcguga	aaaaca	acgaaaacucgauuguuuuagagaaaaaauagucuucuaaaacacucaaguuggcguga	Cbre_Contig31:281055..281114:+
Cbn	uaugccgcgccgauuucaauc	augccg	cugagauuggcgugugggcauauccaucacuuuuugagauaugccgcgccgauuucaauc	Cbre_Contig68:286553..286613:+
Cbn	uauuguaggacuuguauuuauc	auugua	uauuguaggacuuguauuuaucuauugaaauugaauuaugauaaaucauguuuugcaauaac	Cbre_Contig308:16621..16683:-
Cbn	ucaacaggccaagaucagcucu	caacag	agcuggucuuuccuuguugauaaguccacaaacagcgucuaucaacaggccaagaucagcucu	Cbre_Contig21:486385..486448:+
Cbn	ucaaccggaauaacacgcuca	caaccg	agcagguuauuacuuuguugaugaguccaaaaauaauguucaucaaccggaauaacacgcuca	Cbre_Contig21:489597..489660:+
Cbn	ucaauucaggauggugcauaugu	caauuc	ucaauucaggauggugcauaugugaaaacgugcccgaauacacacauauucccuaccuggauugacu	Cbre_Contig77:293846..293913:+
Cbn	ccauccugguacaccacucguc	cauccu	cgaguggucuuccaggcugagcaucuaaaagauuuugccauccugguacaccacucguc	Cbre_Contig30:204628..204687:+
Cbn	cccugccugggucaccaauuguc	ccugcc	gauuggucauccaggcggagcaucucagaaggcuugcccugccugggucaccaauuguc	Cbre_Contig30:201790..201849:+
Cbn	ucucuaaaugauccaguuauguu	cucuaa	ucucuaaaugauccaguuauguuuacggaaauaguaaacaucacuggagcguuucggguua	Cbre_Contig49:111456..111517:-
Cbn	agaggugauuaaauguguucuga	gaggug	agaacacauuuuuuaucccaucuacccgcagaauaaaauggaguagaggugauuaaauguguucuga	Cbre_Contig205:241170..241237:+
Cbn	gggaccuucaauucguucagaga	ggaccu	gggaccuucaauucguucagagagcaagcuuucuuaaacucucugaauggguugaaugugccac	Cbre_Contig154:72003..72067:+
Cbn	uggagguacccuuuacucuga	ggaggu	agggugaagaguugcucuccauucaaaacaacgaaauggagguacccuuuacucuga	Cbre_Contig205:209870..209927:+
Cbn	agggauuacuuccaaguauagu	gggauu	agggauuacuuccaaguauaguaaucacuuguacuacuauacuuguuagucguuccaug	Cbre_Contig34:162610..162669:+
Cbn	uguacaauguccuagcucgau	guacaa	ugaguucggacugaaguauauccauaguuuuugagauguacaauguccuagcucgau	Cbre_Contig68:286417..286474:+
Cbn	ugugauguuauguuggaauucgg	gugaug	ugugauguuauguuggaauucggaauaaauuauuuccccaacuccagcuaauaucacgaa	Cbre_Contig102:60960..61020:+
Cbn	uuacacucaacaucgucgaag	uacacu	uugaugaugcugaauguaacccuuaaaaugagcauuaagguuacacucaacaucgucgaag	Cbre_Contig23:181030..181091:+
Cbn	auagaucuggcuuugugaaauaau	uagauc	uguuucacagcuuaggucuauccgaaaaaaucaaaaucggauagaucuggcuuugugaaauaau	Cbre_Contig81:3849..3913:+
Cbn	guauuaguugugugaccaggaga	uauuag	accuggucaacagcauaauauuaucaaauauugagagugauaguauuaguugugugaccaggaga	Cbre_Contig0:4060024..4060089:+
Cbn	uugauauuguccggguaucggucu	ugauau	uugauauuguccggguaucggucuccacuccggagaccuaccccaucaaugucaaacu	Cbre_Contig68:286710..286768:+
Cbn	uugcccaagcagaauuuucgaa	ugccca	cgagaauucugguacggggcaacuguaauguaagaaacaauaaguugcccaagcagaauuuucgaa	Cbre_Contig91:357071..357137:+
Cbn	guuucacaauaucgucgauau	uuucac	guuucacaauaucgucgauauggaagauuucauuccuaucuugguguucgucccaugguucgagguccuuguggaacuu	Cbre_Contig94:263517..263596:+
Cbn	ugggaucucgaugcuggaauc	gggauc	ugggaucucgaugcuggaauccuuuauaacuauuuucaaauuauucaaggaguuccaccagaguauugaaucg	Cbre_Contig57:365653..365726:+
Cbn	uuuguucgcguugcucaaccaca	uuguuc	uggugggcgacgucgugacgaaucugguauaaauaugauuuguucgcguugcucaaccaca	Cbre_Contig7:467349..467410:-
Cbn	cauacuuauaaggauaaccugu	auacuu	aggcuauccucguauaguauaguaguucaaaaaauuauaagcaugcuaccauacuuauaaggauaaccugu	Cbre_Contig41:539503..539574:-
Cbn	ugagguaguuuggaaaugcugucg	gaggua	ugagguaguuuggaaaugcugucgacgcauugugaugucaacaacauuucaacuaacucggc	Cbre_Contig8:1223147..1223209:+
Cbn	ugagguaguagguuguauaguu	gaggua	ugagguaguagguuguauaguuuagaaucauaucccggugaacuaugcaagcuucuaccucacc	Cbre_Contig2:1723907..1723971:+
Cbn	ugagguaggcucaguagaugcga	gaggua	ugagguaggcucaguagaugcgaacguaaaugagcccacaucggccuuucacauccacuugccuuccucgcc	Cbre_Contig123:222831..222903:-
Cbn	ugagguaggcucaguagaugcga	gaggua	ugagguaggcucaguagaugcgaacguaaaugagcccacaucggccuuucacauccacuugccuuccucgcc	Cbre_Contig3523:3777..3849:-
Cbn	agagguauacccauuagcucuga	gaggua	agaguuaaaggcguaucucuacuauaaaauggauaguagagguauacccauuagcucuga	Cbre_Contig205:240605..240665:-
Cbn	agagguauacccauuagcucuga	gaggua	agaguuaaaggcguaucucuacuauauaacacaaaaauggauaguagagguauacccauuagcucuga	Cbre_Contig91:325741..325809:+
Cbn	agagguaggugcgagaaauga	gaggua	agagguaggugcgagaaaugacgggcaucgugcaaaucguucauugucucccagcuacuucaac	Cbre_Contig123:224986..225050:-
Cbn	agagguaggugcgagaaauga	gaggua	agagguaggugcgagaaaugacgggcaucgugcaaaucguucauugucucccagcuacuucaac	Cbre_Contig2554:5054..5118:+
Cbn	cacccguacauauguuuccgugcu	acccgu	cacccguacauauguuuccgugcuugacaaugaguucaaucacgucacaauuuaugggucg	Cbre_Contig318:1625..1686:+
Cbn	cacccguacauauguuuccgugcu	acccgu	cacccguacauauguuuccgugcuugacaaugaguucaaucacgucacaauuuaugggucg	Cbre_Contig147:145718..145779:+
Cbn	uacccguaaucuucauaauccgag	acccgu	gggauaugagaggacgaguacauugaauucaaccauuacuuguacccguaaucuucauaauccgag	Cbre_Contig2:2465213..2465279:+
Cbn	uacccguauauauuucugcuuag	acccgu	aggcggaaguauagaggguauacuucaucaaguaacuauacccguauauauuucugcuuag	Cbre_Contig2:2465352..2465413:+
Cbn	uacccguaauguuuccgccgag	acccgu	cggccgauacauuucugguguaccucaaaacugaugguacccguaauguuuccgccgag	Cbre_Contig2:2465487..2465546:+
Cbn	uacccguagcuccuauccauguu	acccgu	uacccguagcuccuauccauguuguuaucaaagaagucaacauggaaguugguaccggugca	Cbre_Contig147:149716..149778:+
Cbn	uacccguagcuccuauccauguu	acccgu	uacccguagcuccuauccauguuguuaucaaagaagucaacauggaaguugguacuggugc	Cbre_Contig318:5620..5681:+
Cbn	ugagaucauuaguugaaagccga	gagauc	agcuuucgacaugguucugaacaauacgcauugcauauguuguugagaucauuaguugaaagccga	Cbre_Contig7:1123794..1123860:-
Cbn	ugagaucaucgugaaagcuagu	gagauc	cgguuuucaccuugaucugagagcuaucugaaugcuaucugagaucaucgugaaagcuagu	Cbre_Contig0:979010..979071:-
Cbn	ugagaucguucaguacggcaau	gagauc	ugcccuacucuucgcaucucaucacuucguccgccaauauaaggaugagaucguucaguacggcaau	Cbre_Contig688:38440..38507:-
Cbn	ugagaucguucaguacggcaau	gagauc	ugcccuacucuucgcaucucaucacuucguccgccaauauaaggaugagaucguucaguacggcaau	Cbre_Contig688:485..552:+
Cbn	ugagaucaucgugaaagccagu	gagauc	agguucucacugugaucugcagaguauaaagccuacaucugagaucaucgugaaagccagu	Cbre_Contig0:976053..976114:+
Cbn	agagaucaccaugggguacaa	gagauc	gaccuuaugguugaucuccuaccgacuagcggauaagagaucaccaugggguacaa	Cbre_Contig129:225018..225074:+
Cbn	uaugacacugaagcgaguuggaaa	augaca	uucaacucgucgguagucauuguucggaccaggaaaugaaacuaugacacugaagcgaguuggaaa	Cbre_Contig9:1512106..1512172:+
Cbn	caugacacguaguucgcugaaau	augaca	caugacacguaguucgcugaaaucuuaccgugcauuucaguuaacacgugucaag	Cbre_Contig102:61078..61133:+
Cbn	gaugacacuuguauagucacgguug	augaca	gaugacacuuguauagucacgguuguucucuaaauuuucaaccugccuaucuugugccauag	Cbre_Contig274:39822..39884:-
Cbn	uaugacacuuaagcuaaucugaa	augaca	uaugacacuuaagcuaaucugaaccaauuuagaacuauaggauucaguuuagauaaguggaauagu	Cbre_Contig274:39559..39625:-
Cbn	uaugacacuuaugcauaggugga	augaca	uaugacacuuaugcauagguggaccauucaagaccauaggauccagcuacgcuaaguggaauagu	Cbre_Contig274:39430..39495:-
Cbn	aaugacaauuaaucgcaauugga	augaca	aaugacaauuaaucgcaauuggaccauccgaacuuuaagggcuccgauugcguuaguuggcauag	Cbre_Contig274:39310..39375:-
Cbn	uaugacacuuaagcauaggugga	augaca	uaugacacuuaagcauagguggaccauucaagaccauaggauccagcuacgcuaaguggaauagu	Cbre_Contig274:39181..39246:-
Cbn	uaugacacauaagcguaguugga	augaca	uaugacacauaagcguaguuggaccauccaagaacauaggauccaaccaugauauguggaauagu	Cbre_Contig274:39054..39119:-
Cbn	uaugacacauaugcauaguugga	augaca	uaugacacauaugcauaguuggaucauucaagaccaucgaauccaaccaugauauguggaauagu	Cbre_Contig274:38927..38992:-
Cbn	uaugacacuuaugcauaggugga	augaca	uaugacacuuaugcauagguggaccauucaagaccauaggauccaacuacgcuaaguggaauagu	Cbre_Contig274:38800..38865:-
Cbn	uaugacacauaugcguaguugga	augaca	uaugacacauaugcguaguuggaccauccaacaccauaggauccaaccacaauaugugugauagu	Cbre_Contig274:38549..38614:-
Cbn	uaugacacuuaagcauaggugga	augaca	uaugacacuuaagcauagguggaccauccaagaccaucggcuccagcuaugauaaguggaauagu	Cbre_Contig274:38398..38463:-
Cbn	uaugacacggaucaaugcuugac	augaca	uaugacacggaucaaugcuugacguugauuuaaaucaaauaaaaucaaucauuguucguggcaugcc	Cbre_Contig274:38271..38338:-
Cbn	caugacacugauaaauaguuuga	augaca	caugacacugauaaauaguuugacgcgacaggaaaugaucaaauauuucucggugucaagac	Cbre_Contig274:38024..38086:-
Cbn	uaugacacugggacgguuagga	augaca	uaugacacugggacgguuaggaaccgaacacagcuguguuuccuaaacgcagcagugucguaaa	Cbre_Contig274:37910..37974:-
Cbn	uaugacaaucaaaucuaaguca	augaca	uaugacaaucaaaucuaagucagaguaacaucaaacugacuuaugucugguugucaaagu	Cbre_Contig274:37787..37847:-
Cbn	uaugacacugggacgguuagga	augaca	uaugacacugggacgguuaggaaccgaguguuuccuaaacgcagcagugucguaaa	Cbre_Contig230:85037..85093:+
Cbn	caugacacugauaaauaguuuga	augaca	caugacacugauaaauaguuugacgcgacaggaaaugaucaaauauuucucggugucaagac	Cbre_Contig230:84925..84987:+
Cbn	uaugacacggaucaaugcuugac	augaca	uaugacacggaucaaugcuugacguugauuuaaaucaaauaaaaucaaucauuguucguggcaugcc	Cbre_Contig230:84693..84760:+
Cbn	uaugacacuuaagcauaggugga	augaca	uaugacacuuaagcauagguggaccauccaagaccaucggauccagcuaugauaaguggaauagu	Cbre_Contig230:84568..84633:+
Cbn	uaugacacauaugcguaguugga	augaca	uaugacacauaugcguaguuggaccauccaacaccauaggauccaaccacaauaugugugauagu	Cbre_Contig230:84417..84482:+
Cbn	uaugacacuuaagcauaggugga	augaca	uaugacacuuaagcauagguggaccaucgaagaucauaggcuccagcuaugauaaguggaauagu	Cbre_Contig230:84290..84355:+
Cbn	uaugacacauaagcguaguugga	augaca	uaugacacauaagcguaguuggaccauccaagaacauaggauccaaccaugauaugugugauagu	Cbre_Contig230:83908..83973:+
Cbn	uaugacacuuaagcauaggugga	augaca	uaugacacuuaagcauagguggaccauucaagaccauaggauccagcuacgcuaaguggaauagu	Cbre_Contig230:83781..83846:+
Cbn	aaugacaauuaaucgcaauugga	augaca	aaugacaauuaaucgcaauuggaccauccgaacucuaagggcuccgauugcguuaguuggcauag	Cbre_Contig230:83652..83717:+
Cbn	gaugacacuuguauagucacgguug	augaca	gaugacacuuguauagucacgguuguacucuaaauuuucaaccugccuaucuugugccauag	Cbre_Contig230:83144..83206:+
Cbn	uggaauguaaagaaguaugua	ggaaug	caugcuucuucuacaugcccauacuauaucguaaauggauauggaauguaaagaaguaugua	Cbre_Contig726:84809..84871:-
Cbn	uggaauguaaagaaguaugua	ggaaug	caugcuucuucuacaugcccauacuauaucguaaauggauauggaauguaaagaaguaugua	Cbre_Contig112:224095..224157:+
Cbn	ugacuagagacacauucagcu	gacuag	cuggaugugcucguuagucauaguagccuauccugaacggccuaugacuagagacacauucagcu	Cbre_Contig144:111602..111667:-
Cbn	ugacuagagacacauucagcu	gacuag	cuggaugugcucguuagucauagacgauacacagagaacggucauaugacuagagacacauucagcu	Cbre_Contig900:5965..6032:+
Cbn	ugacuagagacacauucagcu	gacuag	cuggaugugcucguuagucauagacgauacacagagaacggucauaugacuagagacacauucagcu	Cbre_Contig144:117703..117770:+
Cbn	ugacuagaaccgugacucagc	gacuag	ugggucacggugcuuaguccuuccaacagucgguaaugacuagaaccgugacucagc	Cbre_Contig1461:4034..4091:+
Cbn	ugacuagaaccgugacucagc	gacuag	ugggucacggugcuuaguccuuccaacagucgguaaugacuagaaccgugacucagc	Cbre_Contig97:318766..318823:+
Cbn	uggcaagacuauggcaguccacu	ggcaag	ugggcuuccaagucuacccagcacuuaaaaaaguggcuggcaagacuauggcaguccacu	Cbre_Contig0:1030287..1030347:-
Cbn	uggcaagauguuggcauagcuga	ggcaag	uggcaagauguuggcauagcugaaguauccacuagaaaucagcucugcuacauacugccgug	Cbre_Contig105:252854..252916:+
Cbn	uggcaagauguaggcaguucagu	ggcaag	ugagcuuccacaucagaccacagcuauucacaaaaaaaaugcuggcaagauguaggcaguucagu	Cbre_Contig0:1030712..1030777:-
Cbn	uggcaagacaaggcagucuacu	ggcaag	ugggcuuccuuuucguucccagcugaauuucuaaucaugcuggcaagacaaggcagucuacu	Cbre_Contig0:1030564..1030626:-
Cbn	aggcaagacguaaggcguugccg	ggcaag	aggcaagacguaaggcguugccgaacgaaguuucaaccggcagcgccaacguauugccaa	Cbre_Contig135:215576..215636:+
Cbn	uggcaagaaauggcaguccaca	ggcaag	ugggcuuccauuaucuuucccagcagguucacgaacguaugcuggcaagaaauggcaguccaca	Cbre_Contig0:1030438..1030502:-
Cbn	uggcaagauuuaggcaguucaga	ggcaag	aggacugccgagucucugccccagcuaucaguaguauaugcuggcaagauuuaggcaguucaga	Cbre_Contig45:2489..2553:-
Cbn	uggcaagacuuguacuagggcc	ggcaag	caccuguacaucucuugcgacaccaaaaagaaaugaggauuguggcaagacuuguacuagggcc	Cbre_Contig413:95280..95344:-
Cbn	uggcaagacuuguacuagggcc	ggcaag	caccuguacaucucuugcgacaccaaaaaaguaaugggauuguggcaagacuuguacuagggcc	Cbre_Contig114:299097..299161:+
Cbn	gugagcaaaguuucaggugugc	ugagca	cgccugauacuuucgucucaaccucgcuucucucauugucguaggugagcaaaguuucaggugugc	Cbre_Contig1033:14063..14129:-
Cbn	gugagcaaaguuucaggugugc	ugagca	cgccugauacuuucgucucaaccucgcuucucucauugucguaggugagcaaaguuucaggugugc	Cbre_Contig97:46563..46629:+
Cbn	uugagcaaugcgcaugugcgg	ugagca	ucgcccaucccguuguuccaauauuccaacaacaagugauuauugagcaaugcgcaugugcgg	Cbre_Contig8:1269530..1269593:+
Cbn	uaucacagccagcuuugaugugc	aucaca	acgucaaaguggcgcguguuaugucggaaauaugaaaaggaucauaucacagccagcuuugaugugc	Cbre_Contig15:1124864..1124931:+
Cbn	uaucacagccagcuuugaugugc	aucaca	acgucaaaguggcgcguguuaugucggaaauaugaaaaggaucauaucacagccagcuuugaugugc	Cbre_Contig342:69858..69925:+
Cbn	uaucacaguuuacuugcugucgc	aucaca	gauaucaaggaacuugugauuuaugccauaacuaacauaaccucgacauaucacaguuuacuugcugucgc	Cbre_Contig144:117558..117629:+
Cbn	uaucacaguuuacuugcugucgc	aucaca	gauaucaaggaacuugugauuuaugccauaacuaacauaaccucgacauaucacaguuuacuugcugucgc	Cbre_Contig900:5820..5891:+
Cbn	aaucacagucaacuguuggca	aucaca	ccggcaguugccuguugauccgccgcaauuaugauggacgaaucacagucaacuguuggca	Cbre_Contig97:318894..318955:+
Cbn	aaucacagucaacuguuggca	aucaca	ccggcaguugccuguugauccgccgcaauuaugauggacgaaucacagucaacuguuggca	Cbre_Contig1461:4162..4223:+
Cbn	uuuguacuccgaugccauucaga	uuguac	uggaugugaucggguguaaaaagcuauccacgaagaaucgcuuuguacuccgaugccauucaga	Cbre_Contig7:1125976..1126040:-
Cbn	uuuguacuucacaagaguacug	uuguac	uuuguacuucacaagaguacuggcgguucagguccggcucagaacuuuuguggggugcaaga	Cbre_Contig21:126207..126269:+
Cbn	uuuguacuacacauagguacugg	uuguac	uuuguacuacacauagguacuggaaaacuuaccacagauuauccagugcuuggucuagugcaaga	Cbre_Contig21:125162..125227:-
Cbn	uuuguacuaaacauagguacuga	uuguac	uuuguacuaaacauagguacugaaauaaaauauuuuauuuacucaguuccuagucuagugcaaggg	Cbre_Contig205:208108..208174:+
Cbn	uuuguacuaaacauagguacuga	uuguac	uuuguacuaaacauagguacugaaauaaaauauuuuauuuacucaguuccuagucuagugcaaggg	Cbre_Contig91:360758..360824:+
Cbn	uuuguaccgauuauaggcaacuga	uuguac	uuuguaccgauuauaggcaacugauuuuugaacguuuucagugccuauuucaguacaaua	Cbre_Contig205:208242..208302:+
Cbn	uuuguaccgauuauaggcaacuga	uuguac	uuuguaccgauuauaggcaacugauuuagagaguuuucagugccuauuucaguacaaua	Cbre_Contig91:360892..360951:+
Cbn	ugauaugucugguauucuuggguuc	gauaug	ugauaugucugguauucuuggguucauuccuuacucugaaccaguuuauuagacguaucgac	Cbre_Contig18:881171..881233:-
Cbn	ugauauguuguuugaaugcccc	gauaug	ggcuuucaacaacgauaucaaccgauuuucaguaaauugcgaguugauauguuguuugaaugcccc	Cbre_Contig7:1135033..1135099:+
Cbn	ugauauguaaucuagcuuacag	gauaug	gugaguuagauaucguauccuuccgcuuaaugguaaugauauguaaucuagcuuacag	Cbre_Contig32:517266..517324:-
Cbn	ucccugagaccucaaguguga	cccuga	ucccugagaccucaagugugagcguacuguagaugcuucacaccugggcucucuggguacc	Cbre_Contig36:499331..499392:+
Cbn	ucccugagaccucaaguguga	cccuga	ucccugagaccucaagugugagcguacuguagaugcuucacaccugggcucucuggguacc	Cbre_Contig639:19743..19804:+
Cbn	ucccugagaauacucuggcagcu	cccuga	ucccugagaauacucuggcagcucgaaaaguaugucuagcugcugaguaccaucggggacc	Cbre_Contig108:325351..325412:-
Cbn	uggcagugccgauucuaguggc	ggcagu	ucacugguuucuucauugccacaucaaaucagaaaggguuguggcagugccgauucuaguggc	Cbre_Contig181:214508..214571:-
Cbn	uggcagugccgauucuaguggc	ggcagu	ucacugguuucuucauugccacaucaaaucagaaagaguuguggcagugccgauucuaguggc	Cbre_Contig955:18000..18063:+
Cbn	uggcagugauugagauuguucuaa	ggcagu	aggaccaucucucuccugccccacuuaucccuuugguauauaaguggcagugauugagauuguucuaa	Cbre_Contig205:202139..202207:-
Cbn	uggcaguggauagcuccuuuga	ggcagu	aaggagcuauucgcgaccacucaugauucaugaaaaugaaguggcaguggauagcuccuuuga	Cbre_Contig205:203996..204059:-
Cbn	uaagcucgugaucaacaggcagga	aagcuc	ugacuguuucaaaagcuuauauuguucguucaaaguuacuuauaagcucgugaucaacaggcagga	Cbre_Contig7:790924..790990:+
Cbn	uaagcucgucauuguuuccuuucu	aagcuc	aaaggaaccaugcgaucuuacaacaauaaaaguguguaagcucgucauuguuuccuuucu	Cbre_Contig0:55935..55995:+
Cbn	uuaaguaguggugccgcucuua	uaagua	uuaaguaguggugccgcucuuauuagaugagauaguaauaagaguugcucacuacuuauca	Cbre_Contig9:278689..278750:-
Cbn	auaaguaguagugccgcagguaa	uaagua	auaaguaguagugccgcagguaaccgauuucaaugguuuaccuacugccuccugcuuagaa	Cbre_Contig28:301990..302051:+
Cbn	auaaguaguagugccgcagguaa	uaagua	auaaguaguagugccgcagguaaccgauuucaaugguuuaccuacugccuccugcuuagaa	Cbre_Contig529:52932..52993:+
Cbn	aaaugccagucguugcaggaau	aaugcc	cccuguaauacugugcauauacaugucauguaacuaauguaaaugccagucguugcaggaau	Cbre_Contig968:8697..8759:-
Cbn	aaaugccagucguugcaggaau	aaugcc	cccuguaauacugugcauauacaugucauacaacuaauguaaaugccagucguugcaggaau	Cbre_Contig128:87084..87146:+
Cbn	ugucauggagucgcucucuuca	gucaug	aagagagccgucuauugacaguucgucucuguucagucagguacugucauggagucgcucucuuca	Cbre_Contig13:883774..883840:-
Cbn	ugucauggaggcgcucucuuca	gucaug	aagggagcuuucuggugacaguucgauuuugaacucuuacugucauggaggcgcucucuuca	Cbre_Contig42:326154..326216:+
Cbn	aagcaccacgagaagcugcaga	agcacc	cgcgguuuuuuuguguagugcuccgcaccaucgaguguucgaagcaccacgagaagcugcaga	Cbre_Contig9:1284685..1284748:-
Cbn	uagcaccauauaaauucaguau	agcacc	acugaguuuauuugaguacuuagacggccauuagagcaacgaucuagcaccauauaaauucaguau	Cbre_Contig92:535812..535878:-
Cbn	uagcaccauauaaauucaguau	agcacc	acugaguuuauuugaguacuuagacggccauuagagcaacgaucuagcaccauauaaauucaguau	Cbre_Contig235:108667..108733:+
Cbn	uuaaagcuaccaaccggcuuca	uaaagc	aggucgguugcaagcuucaauacauuuaugaaauugauauuaaagcuaccaaccggcuuca	Cbre_Contig0:1025889..1025950:-
Cbn	auaaagcuagguuaccaaagcu	uaaagc	cuuuggugauucaguuuuaaugauugacgauucaacguuuucuucauaaagcuagguuaccaaagcu	Cbre_Contig15:169201..169268:-
Cbn	auaaagcuagguuaccaaagcu	uaaagc	cuuuggugauucaguuuuaaugauugacgauuuaccguuuucuucauaaagcuagguuaccaaagcu	Cbre_Contig648:22277..22344:+
Cbn	cuuggcacucgcgaacaccgcga	uuggca	cuuggcacucgcgaacaccgcgaucuaacuguauaaaucgcggcguuagcucguggcaaaca	Cbre_Contig67:887164..887226:-
Cbn	cuuggcacucgcgaacaccgcga	uuggca	cuuggcacucgcgaacaccgcgaucuaacuguauaaaucgcggcguuagcucguggcaaaca	Cbre_Contig521:36581..36643:+
Cbn	uaagugaaugcuuugccacaguc	aaguga	uaagugaaugcuuugccacagucuucgaccaugucaaaggaagccugggcucagauucgcuuaggc	Cbre_Contig146:95635..95701:+
Cbn	uaagugaauuccucgugcuucaau	aaguga	uggagcaggacucauucgcuuagccgaacaguaucgaugcuaagugaauuccucgugcuucaau	Cbre_Contig0:1027213..1027277:+
Cbn	uaaggcacgcggugaaugcca	aaggca	gcauacaccugagugacuuuaguggacaucugaaguuuccaacuaaggcacgcggugaaugcca	Cbre_Contig161:45965..46029:-
Cbn	uaaggcacgcggugaaugcca	aaggca	gcauacaccugagugacuuuaguggacaucugaaguuuccaacuaaggcacgcggugaaugcca	Cbre_Contig612:66880..66944:+
Cbn	aauggcacugcaugaauucacgg	auggca	aauggcacugcaugaauucacggaugcauugcgacagaccgcggaucaugcgguaccauag	Cbre_Contig67:892127..892188:-
Cbn	aauggcacugcaugaauucacgg	auggca	aauggcacugcaugaauucacggaugcauugcgacagaccgcggaucaugcgguaccauag	Cbre_Contig521:31336..31397:+
Cbn	uauggcacaaacuuguacucugu	auggca	agaggcaaguuucuuccaaacauaccaaguaagaguauguauggcacaaacuuguacucugu	Cbre_Contig101:236643..236705:+
Cbn	guauuaguugugugaccaggaga	uauuag	accuggucaacagcauaauauuaucaaauauugagagugauaguauuaguugugugaccaggaga	Cbre_Contig0:4060024..4060089:+
Cbn	uaaaugcaucuuaacugcgguga	aaaugc	cccguaguuucgaucauuuuauccugcccaacucaaaaagugauaaaugcaucuuaacugcgguga	Cbre_Contig147:174313..174379:+
Cbn	uuauugcucaagaauacccuu	uauugc	cgguauucuuugguuaauaauaaggauggcaucacgacucauuauauuauugcucaagaauacccuu	Cbre_Contig659:54270..54337:-
Cbn	uuauugcucaagaauacccuu	uauugc	cgguauucuuugguuaauaauaaggauggcaucacgacucauuauauuauugcucaagaauacccuu	Cbre_Contig261:81074..81141:+
Cbn	uauugcacucgccccggccuga	auugca	agguccuggcugacugcauauauugcucaacguuaaagaaugcuaauauugcacucgccccggccuga	Cbre_Contig98:204892..204960:+
Cbn	uauugcacaaauuguguucaucu	auugca	uauugcacaaauuguguucaucuauuaagguugaaauaagaugaauggauucgugcaauaau	Cbre_Contig81:7825..7887:+
Cbn	uaauacugucagguaaugacgcu	aauacu	gucuuaccuguucaauauuuagacuaacacaucaagagaucuaauacugucagguaaugacgcu	Cbre_Contig66:96229..96293:-
Cbn	uaauacugucagguaaugacgcu	aauacu	gucuuaccuguucaauauuuagacuaacacaucaagagaucuaauacugucagguaaugacgcu	Cbre_Contig66:88008..88072:-
Cbn	uugcguaggccuuugcuucga	ugcgua	uugcguaggccuuugcuucgaaagccacuugucccacauucguagcaauauccuacgcaaua	Cbre_Contig43:5330..5392:+
Cbn	ucuuugguuguacaaagugguaug	cuuugg	ucuuugguuguacaaagugguauggcaauuucauuaaaaaugcucauaccgcuuuucagcugaagga	Cbre_Contig18:864643..864710:+
Cbn	auugguccccuccaaguagcuc	uugguc	gcugcuugcaagguaccuaauuguuugaaauucauucucaauugguccccuccaaguagcuc	Cbre_Contig480:40056..40118:+
Cbn	auugguccccuccaaguagcuc	uugguc	gcugcuugcaagguaccuaauuguuugaaauucauucucaauugguccccuccaaguagcuc	Cbre_Contig6:465013..465075:+
Cbn	uuuggucgucgagacguucaaa	uugguc	ugaacauccuggugaccaaacacaguugauucgggauguuuggucgucgagacguucaaa	Cbre_Contig179:139214..139274:+
Cbn	uuuggucgucgagacguucaaa	uugguc	ugaacauccuggugaccaaacacaguuaaaucgggauguuuggucgucgagacguucaaa	Cbre_Contig480:40056..40118:+
Cbn	uuacauguuccggguaggagc	uacaug	accuggccgaaaucauguaauauaacaaugaguucuauuacauguuccggguaggagc	Cbre_Contig147:205183..205241:-
Cbn	uuacauguuccggguaggagc	uacaug	accuggccgaaaucauguaauauugcaaugaguucuauuacauguuccggguaggagc	Cbre_Contig318:84294..84352:-
Cbn	cuacacgugcacggauaacgcuca	uacacg	agcgcuauccagccguuguaaucaagaacggagguugacuacacgugcacggauaacgcuca	Cbre_Contig0:1122568..1122630:+
Cbn	ucacaggacuuuugagcguugc	cacagg	aacgcuagaagucuacuguuagacagaguacagaaauuuugucacaggacuuuugagcguugc	Cbre_Contig0:1355963..1356026:-
Cbn	ugcaaaucugucgcaucuguagg	gcaaau	uacagaagcauagauuuucacauaccgaucugaagaguuugugcaaaucugucgcaucuguagg	Cbre_Contig0:96376..96440:-
Cbn	aaacugaagagauuuuuuacag	aacuga	guaagaaaucuuugugguuuuccguuaugagacgagaaaacugaagagauuuuuuacag	Cbre_Contig1878:5099..5157:+
Cbn	aaacugaagagauuuuuuacag	aacuga	guaagaaaucuuugugguuuuccguuaugagacgagaaaacugaagagauuuuuuacag	Cbre_Contig33:76788..76846:+
Cbn	uaaucucauccuaaucuggucgca	aaucuc	uaaucucauccuaaucuggucgcaucacaaaacuuaccugcuaccgauuuggcuugggauuga	Cbre_Contig65:6483..6546:+
Cbn	acggcuaccuucacugccacc	cggcua	aggcagugugguuagcugguugcauacugacauugacaacggcuaccuucacugccacc	Cbre_Contig0:541762..541821:+
Cbn	uuuguuuuagccugagcuaug	uuguuu	uuuguuuuagccugagcuauguguuauugcacauacauagcuacuuguuaaaacauacc	Cbre_Contig478:90678..90737:-
Cbn	uuuguuuuagccugagcuaug	uuguuu	uuuguuuuagccugagcuauguguuauugcacauacauagcuacuuguuaaaacauacc	Cbre_Contig156:217703..217762:-
Cbn	ucacugguuuucuucugacgaa	cacugg	ugucagagcaauccucaguaacacguacucauuauuugugucacugguuuucuucugacgaa	Cbre_Contig0:1354736..1354798:+
Cbn	uacccuguagauagagcugugugu	acccug	uacccuguagauagagcuguguguuuggaauauaccguacacaagcuagacuacaaggugaa	Cbre_Contig239:71001..71063:-
Cbn	uacccuguagauagagcugugugu	acccug	uacccuguagauagagcuguguguuuggaauauaccguacacaagcuagacuacaaggugaa	Cbre_Contig239:80664..80726:-
Cbn	uauuaugcacauuuucuagucca	auuaug	agcuggaaaggugacauaaaaucaugucagagaacgcgauauuaugcacauuuucuagucca	Cbre_Contig36:1026449..1026511:-
Cbn	uauuaugcacauuuucuagucca	auuaug	agcuggaaaggugacauaaaaucaugucagagaacgcgauauuaugcacauuuucuagucca	Cbre_Contig519:43441..43503:+
Cbn	ucacaaccuccuagaaagagugga	cacaac	aacucauucugcugguuguuaugccaaacauugaaauuuaagcaucacaaccuccuagaaagagugga	Cbre_Contig14:796085..796153:-
Cbn	uaauacgucauuugguguuuccg	aauacg	ugaaccaccacugacgaaucacauugaaacuaaagagauguaauacgucauuugguguuuccg	Cbre_Contig2104:8306..8369:-
Cbn	uucguuguugaugaagucuuaa	ucguug	aggacuucacaauagucgaauaccgauagcaggauauucguuguugaugaagucuuaa	Cbre_Contig31:237120..237178:-
Cbn	uucaucaggccauagcugucca	ucauca	gauggcugugccuugaagaaauacaguuagugucauuucaucaggccauagcugucca	Cbre_Contig4:592158..592216:-
Cbn	cggcacaauguuuaugaguagau	ggcaca	cggcacaauguuuaugaguagauaaaucacaucuugaucuacacauauccauuguaccucc	Cbre_Contig30:144750..144811:+
Cbn	uacaaaguauuugaaaagccgugc	acaaag	ccgacuuuucaauauuuugaaaccaguuauucugagaaugguuacaaaguauuugaaaagccgugc	Cbre_Contig90:27640..27706:+
Cbn	ucgaaucguuuaucaggauguug	cgaauc	acguccugaaaacgaaacgaaacugauucauuguaaagagauuucgaaucguuuaucaggauguug	Cbre_Contig414:188227..188293:-
Cbn	ucgaaucguuuaucaggauguug	cgaauc	acguccugaaaacgaaacgaaacugauucauugaaaagagauuucgaaucguuuaucaggauguug	Cbre_Contig317:37668..37734:-
Cbr = C. briggsae
Cre = C. remanei
Cbn = C. brenneri
