# Supplementary material for: High-throughput sequencing reveals extraordinary fluidity of miRNA, piRNA, and siRNA pathways in nematodes
Source: HighWire-hosted journal article supplement (doi:10.1101/gr.149112.112), 2013-01-30
Supplement: TableS4.xlsx [file TableS4.xlsx]

## Sheet: Tabe S4
Table S4. Overview of all miRNA families
Seed	C.elegans	C.briggsae	C. remanei	C. brenneri
acuggc	mir-240-3p	cbr-miR-240
gauaug	cel-miR-90 ,cel-miR-62 ,cel-miR-50	cbr-miR-90b ,cbr-miR-90 ,cbr-miR-50 ,cbr-miR-62	crm-miR-90 ,crm-miR-50 ,crm-miR-62	Cbre_Contig18_3297 ,Cbre_Contig7_1751 ,Cbre_Contig32_5288
ugagca	cel-miR-87 ,cel-miR-233 ,cel-mir-356	cbr-miR-87 ,cbr-miR-233 ,cbr-miR-87 ,cbr-miR-233	crm-miR-87 ,crm-miR-233	Cbre_Contig1033_46542 ,Cbre_Contig97_17971
aaguga	cel-miR-86-5p ,cel-miR-785	cbr-miR-86 ,cbr-miR-785 ,chrX_43451	crm-miR-86 ,crm-miR-785	Cbre_Contig146_23462 ,Cbre_Contig0_9
acaaag	cel-miR-85	cbr-miR-85	crm-miR-85	Cbre_Contig90_17529
agcacc	cel-miR-83-5p ,cel-miR-49	cbr-miR-83 ,cbr-miR-49	crm-miR-83 ,crm-miR-49	Cbre_Contig92_17690 ,Cbre_Contig235_28115 ,Cbre_Contig9_2038
gaaccc	cel-miR-799
aagccu	cel-miR-798
uuucau	cel-miR-797
uuggca	cel-miR-790	cbr-miR-790 ,cbr-miR-790	crm-miR-790 ,crm-miR-790	Cbre_Contig0_33
uaaagc	cel-miR-79 ,cel-miR-75	cbr-miR-79	crm-miR-79 ,crm-miR-75	Cbre_Contig15_2934 ,Cbre_Contig648_43351 ,Cbre_Contig0_58
auugau	cel-miR-789
cgcuuc	cel-miR-788
aaugcc	cel-miR-786 ,cel-miR-357	cbr-miR-786 ,cbr-miR-357 ,cbr-miR-357	crm-miR-786	Cbre_Contig968_46214 ,Cbre_Contig128_20149
ggcaca	cel-miR-784	cbr-miR-784	crm-miR-784	Cbre_Contig30_5134
ggaggc	cel-miR-78
ucauca	cel-miR-77,cel-mir-4938	cbr-miR-77 ,cbr-miR-77	crm-miR-77 ,crm-miR-77 ,crm-miR-77	Cbre_Contig4_988
ucguug	cel-miR-76	cbr-miR-76	crm-miR-76
ggcaag	cel-miR-72 ,cel-miR-73 ,cel-miR-74 ,cel-mir-266	cbr-miR-73b ,cbr-miR-74b ,cbr-miR-2225 ,cbr-miR-73 ,cbr-miR-74 ,cbr-miR-74	crm-miR-72 ,crm-miR-74a ,crm-miR-74b ,crm-miR-73 ,crm-miR-74a ,Crem_Contig259_14611	Cbre_Contig413_38342 ,Cbre_Contig114_18677 ,Cbre_Contig105_18314 ,Cbre_Contig135_21054 ,Cbre_Contig0_60 ,Cbre_Contig0_66 ,Cbre_Contig0_64 ,Cbre_Contig0_62 ,Cbre_Contig45_6622
gaaaga	cel-mir-71	cbr-miR-71	crm-miR-2229 ,crm-miR-71 ,crm-miR-2229 ,Crem_Contig0_155 ,Crem_Contig0_133
aauacg	cel-miR-70	cbr-miR-70	crm-miR-70	Cbre_Contig2104_48784
cacaac	cel-miR-67	cbr-miR-67	crm-miR-67	Cbre_Contig14_2880
augaca	cel-miR-66 ,cel-miR-64 ,cel-miR-65 ,,cel-miR-63 ,cel-mir-229	cbr-miR-64 ,cbr-miR-64b ,cbr-miR-2226 ,chrIII_17813	crm-miR-64c ,crm-miR-64c ,crm-miR-64a ,crm-miR-64e ,crm-miR-64b ,crm-miR-64d ,crm-miR-66 ,crm-miR-63 ,crm-miR-64a ,Crem_Contig41_2004	Cbre_Contig274_31327 ,Cbre_Contig230_27890 ,Cbre_Contig102_18130 ,Cbre_Contig274_31311 ,Cbre_Contig230_27906 ,Cbre_Contig274_31307 ,Cbre_Contig274_31317 ,Cbre_Contig230_27900 ,Cbre_Contig274_31313 ,Cbre_Contig230_27904 ,Cbre_Contig9_2017 ,Cbre_Contig274_31309 ,Cbre_Contig230_27908 ,Cbre_Contig274_31325 ,Cbre_Contig230_27892 ,Cbre_Contig274_31315 ,Cbre_Contig230_27898 ,Cbre_Contig230_27902 ,Cbre_C…
gacuag	cel-miR-61 ,cel-miR-45-5p ,cel-miR-44-5p ,cel-miR-247	cbr-miR-61 ,cbr-miR-44 ,cbr-miR-45 ,cbr-miR-45 ,cbr-miR-44 ,chrX_44245	crm-miR-61 ,crm-miR-45 ,crm-miR-44 ,crm-miR-247 ,crm-miR-44	Cbre_Contig1461_47871 ,Cbre_Contig97_17989 ,Cbre_Contig144_22644 ,Cbre_Contig900_45817 ,Cbre_Contig144_22593
auuaug	cel-miR-60	cbr-miR-60	crm-miR-60	Cbre_Contig36_5838 ,Cbre_Contig519_41237
cgaauc	cel-miR-59		crm-miR-59
acccug	cel-miR-57	cbr-miR-57	crm-miR-57 ,crm-miR-57	Cbre_Contig239_28959 ,Cbre_Contig239_28961
ggcgga	cel-miR-56
acccgu	cel-miR-51, cel-miR-52 ,cel-miR-55 ,cel-miR-54-5p ,cel-miR-53	cbr-miR-55 ,cbr-miR-56 ,cbr-miR-54d ,chrI_7721	crm-miR-55 ,crm-miR-52 ,crm-miR-52 ,Crem_Contig43_28323 ,Crem_Contig20_16251 ,Crem_Contig1341_18236	Cbre_Contig2_323 ,Cbre_Contig2_327 ,Cbre_Contig147_23510 ,Cbre_Contig318_33780 ,Cbre_Contig2_325 ,Cbre_Contig318_33778 ,Cbre_Contig147_23508
ugggua	cel-mir-4937
uaggag	cel-mir-4926
uucgaa	cel-mir-4925
acggcg	cel-mir-4923b
uaagga	cel-mir-4920
ucuaca	cel-miR-4816
ucaaua	cel-miR-4813	chrIII_15945
agagcg	cel-mir-4812
auaaca	cel-miR-4811
gaguau	cel-mir-4810
aauaca	cel-mir-4809
acuuac	cel-mir-4806
gaggua	cel-miR-48 ,cel-let-7 ,cel-miR-794 ,cel-miR-795 ,cel-miR-793 ,cel-mir-84	cbr-miR-48 ,cbr-let-7 ,cbr-miR-84 ,cbr-miR-241 ,cbr-miR-241 ,cbr-let-7 ,chrIII_20196 ,chrX_44365 ,chrX_44367 ,chrX_44369 ,chrX_47036	crm-miR-48 ,crm-let-7 ,crm-miR-84 ,crm-mir-241,Crem_Contig0_99 ,Crem_Contig22_18360	Cbre_Contig123_19255 ,Cbre_Contig2554_49130 ,Cbre_Contig205_26310 ,Cbre_Contig91_17597 ,Cbre_Contig2_262 ,Cbre_Contig8_1984 ,Cbre_Contig123_19253 ,Cbre_Contig3523_49449
gucaug	cel-miR-46 ,cel-miR-47	cbr-miR-46 ,cbr-miR-47 ,cbr-miR-47	crm-miR-47 ,crm-miR-46	Cbre_Contig42_6373 ,Cbre_Contig13_2694
gugguu	cel-miR-41-5p
aucauc	cel-miR-392			Cbre_Contig17_3093
ugugac	cel-miR-360	cbr-miR-360
cacugg	cel-miR-359	cbr-miR-359 ,cbr-miR-359	Crem_Contig0_360	Cbre_Contig0_15
uuggua	cel-miR-358		Crem_Contig13_6924
uuguuu	cel-miR-355	cbr-miR-355	crm-miR-355	Cbre_Contig478_39827 ,Cbre_Contig156_23737
caccgg	cel-miR-35 ,cel-miR-36 ,cel-miR-37 ,cel-miR-38 ,cel-miR-39 ,cel-miR-40 ,cel-miR-41,cel-miR-42	cbr-miR-36 ,cbr-miR-36 ,cbr-miR-35d ,cbr-miR-35 ,cbr-miR-40 ,cbr-miR-41b ,cbr-miR-35e ,cbr-miR-39 ,cbr-miR-42 ,cbr-miR-35c ,cbr-miR-35c ,chrX_44633 ,chrX_44629 ,chrX_44631 ,chrX_44623	crm-miR-40 ,crm-miR-39 ,crm-miR-39 ,crm-miR-41 ,crm-miR-35g ,crm-miR-35f ,crm-miR-38 ,crm-miR-35e ,crm-miR-35e ,crm-miR-35c ,crm-miR-35c ,crm-miR-35c ,crm-miR-35a ,crm-miR-35d ,crm-miR-35d ,crm-miR-35a ,crm-miR-35a ,Crem_Contig93_7080 ,Crem_Contig93_7052 ,Crem_Contig93_7056	Cbre_Contig28_4830 ,Cbre_Contig831_45132 ,Cbre_Contig831_45135 ,Cbre_Contig831_45136 ,Cbre_Contig28_4834 ,Cbre_Contig28_4828 ,Cbre_Contig831_45130 ,Cbre_Contig34_5470 ,Cbre_Contig34_5510 ,Cbre_Contig34_5514 ,Cbre_Contig34_5516 ,Cbre_Contig34_5498 ,Cbre_Contig34_5518 ,Cbre_Contig34_5517 ,Cbre_Contig34_5508 ,Cbre_Contig34_5476 ,Cbre_Contig34_5504 ,Cbre_Contig34_5506 ,Cbre_Contig34_5500 ,Cbre_Contig…
cggcua	cel-miR-34	cbr-miR-34	crm-miR-34	Cbre_Contig0_5
acagaa	cel-mir-2953	cbr-miR-254	Crem_Contig15_9127
gcaaga	cel-mir-269
aaucuc	cel-miR-259	cbr-miR-259	crm-miR-259	Cbre_Contig65_12894
guuuug	cel-mir-258-2
aguauc	cel-mir-257
aacuga	cel-miR-255	cbr-miR-255	Crem_Contig8_46069
gcaaau	cel-miR-254			Cbre_Contig0_36
uaguag	cel-miR-253	cbr-miR-253
uaagua	cel-miR-252 ,cel-miR-251	cbr-miR-252 ,cbr-miR-251	crm-miR-252	Cbre_Contig28_4742 ,Cbre_Contig529_41358
aucaca	cel-miR-250 ,cel-miR-2 ,cel-miR-43	cbr-miR-250 ,cbr-miR-43 ,chrI_4726	crm-miR-2 ,crm-miR-250 ,crm-miR-43 ,crm-miR-43	Cbre_Contig97_17991 ,Cbre_Contig1461_47873 ,Cbre_Contig1461_47874 ,Cbre_Contig15_2927 ,Cbre_Contig342_34839
cacagg	cel-miR-249	cbr-miR-249	crm-miR-249	Cbre_Contig0_72
uacacg	cel-miR-248	cbr-miR-248	crm-miR-248	Cbre_Contig0_11
uacaug	cel-miR-246	cbr-miR-246	crm-miR-246 ,crm-miR-246	Cbre_Contig147_23516 ,Cbre_Contig318_33782
uugguc	cel-miR-245	cbr-miR-245	crm-miR-245	Cbre_Contig480_40005 ,Cbre_Contig6_1451 ,Cbre_Contig179_24543 ,Cbre_Contig496_40526
cuuugg	cel-miR-244	cbr-miR-244	crm-miR-244	Cbre_Contig18_3236
aucucg	cel-miR-243
ugcgua	cel-miR-242	cbr-miR-242	crm-miR-242
uugucu	cel-miR-241
gaggau	cel-miR-240-5p
uuguac	cel-miR-238 ,cel-miR-239a ,cel-miR-239b	cbr-miR-238 ,cbr-miR-239a ,cbr-miR-239b ,cbr-mir-2223	crm-miR-238 ,crm-miR-239a ,crm-miR-239b ,crm-miR-238 ,Crem_Contig22_18355	Cbre_Contig205_26286 ,Cbre_Contig91_17606 ,Cbre_Contig205_26284 ,Cbre_Contig91_17604 ,Cbre_Contig21_3564 ,Cbre_Contig7_1928 ,Cbre_Contig21_3587
cccuga	cel-miR-237 ,cel-lin-4	cbr-miR-237 ,cbr-lin-4 ,chrX_46070	crm-miR-237 ,crm-lin-4 ,crm-miR-2231 ,crm-miR-2231	Cbre_Contig36_5722 ,Cbre_Contig639_43192 ,Cbre_Contig108_18477
aauacu	cel-miR-236	cbr-miR-236	crm-miR-236	Cbre_Contig66_12988 ,Cbre_Contig66_12986
auugca	cel-miR-235	cbr-miR-235b ,cbr-miR-235	crm-miR-235	Cbre_Contig81_16154 ,Cbre_Contig98_18027
uauugc	cel-miR-234	cbr-miR-234	Crem_Contig218_13813	Cbre_Contig659_43378 ,Cbre_Contig261_30363
aaaugc	cel-miR-232-5p	cbr-miR-232 ,cbr-miR-232	crm-miR-357 ,crm-miR-232 ,crm-miR-232	Cbre_Contig147_23511
aagcuc	cel-miR-231 ,cel-miR-787	cbr-miR-231 ,cbr-miR-787	crm-miR-231 ,crm-miR-787	Cbre_Contig0_1 ,Cbre_Contig7_1715
cuuggu	cel-miR-230	cbr-miR-230
auggca	cel-miR-228	cbr-miR-228	crm-miR-228	Cbre_Contig67_13929 ,Cbre_Contig521_41290 ,Cbre_Contig101_18107
gagauc	cel-miR-227 ,cel-miR-58 ,cel-miR-82 ,cel-miR-81 ,cel-miR-2209a ,cel-mir-1834	cbr-miR-80 ,cbr-miR-58 ,cbr-miR-81 ,cbr-miR-82 ,cbr-miR-1834 ,cbr-miR-81	crm-miR-80 ,crm-miR-58a ,crm-miR-81 ,crm-miR-82 ,Crem_Contig279_39761 ,Crem_Contig469_27904	Cbre_Contig34_5423 ,Cbre_Contig0_7 ,Cbre_Contig688_43566 ,Cbre_Contig688_43561 ,Cbre_Contig129_20513 ,Cbre_Contig7_1926 ,Cbre_Contig0_56
cacauu	cel-mir-2216
agcugu	cel-mir-2213
ggcaga	cel-miR-2212	cbr-mir-72
aaaguc	cel-miR-2210
agugua	cel-miR-2208b-5p
cagcga	cel-miR-1832
cuagga	cel-miR-1830-5p
agcgaa	cel-mir-1829c
agcgau	cel-mir-1829b
aaccau	cel-mir-1829a
ggcagu	cel-miR-1824 ,cel-mir-4933	cbr-miR-2227	crm-miR-2227 ,Crem_Contig22_18438	Cbre_Contig181_24930 ,Cbre_Contig955_46143 ,Cbre_Contig205_26306 ,Cbre_Contig91_17609 ,Cbre_Contig91_17611 ,Cbre_Contig205_26304
gagcug	cel-miR-1822
uuugau	cel-miR-1820		Crem_Contig129_48372
gugguc	cel-mir-1818
agccaa	cel-miR-1817	cbr-miR-1817	Crem_Contig4_40404
aaggca	cel-miR-124	cbr-miR-124 ,chrX_45684 ,chrX_45686	crm-miR-124 ,Crem_Contig45_42204	Cbre_Contig161_23858 ,Cbre_Contig612_42535
agauca	cel-miR-1022
agugag	cel-mir-1021
gagaga	cel-miR-1018
ggaaug	cel-miR-1 ,cel-miR-1819 ,cel-mir-796	cbr-miR-1 ,chrX_45657	crm-miR-1	Cbre_Contig8_2004
uuugua	cel-lsy-6	cbr-lsy-6
ggaauc		chrX_46964
aaccca		chrX_46762 ,chrX_44345	crm-miR-2230	Cbre_Contig89_17526
cuagaa		chrX_45336
guugca		chrX_45288
cauccg		chrX_44729 ,chrX_45303
aaccag		chrX_44637	Crem_Contig93_7050	Cbre_Contig34_5466
aaaccg		chrX_44415
gcugca		chrX_44270
ggaaau		chrX_43199
gacaug		chrX_43181	Crem_Contig25_22141
gaggac		chrV_41016	Crem_Contig0_131 ,Crem_Contig0_127 ,Crem_Contig0_125 ,Crem_Contig69_27332 ,Crem_Contig69_27295	Cbre_Contig26_4569 ,Cbre_Contig570_41925
ggucuu		chrV_38586
aucggu		chrIV_28673
ucgaaa		chrIV_22450
gagaua		chrI_4223 ,chrII_11571
acgugg		cbr-miR-789
aauggg		cbr-miR-788
cuaccg		cbr-miR-65
guacuu		cbr-miR-54c ,cbr-miR-54c
guauuc		cbr-miR-54a
guacau		cbr-miR-52
ucaucg		cbr-miR-392	Crem_Contig31_29881
ccgggu		cbr-miR-38
gccaau		cbr-miR-35b
aaguau		cbr-mir-353
ugaggu		cbr-miR-2224
cucggu		cbr-mir-2214
agcugc		cbr-miR-1822	Crem_Contig6_44020	Cbre_Contig376_35988 ,Cbre_Contig36_5745
ccgcuu			crm-miR-788
gcccua			crm-miR-58a
uuguuc			crm-miR-356	Cbre_Contig7_1846
auuagu			crm-miR-230
cuauuu			crm-miR-2228
guugag			Crem_Contig86_44272
gauguu			Crem_Contig84_41012
cuacca			Crem_Contig56_10065 ,Crem_Contig119_39268
ggauau			Crem_Contig43_28320
gggauc			Crem_Contig423_20415 ,Crem_Contig423_20421 ,Crem_Contig494_8902 ,Crem_Contig132_6364	Cbre_Contig57_9554
uaaguu			Crem_Contig33_33153 ,Crem_Contig0_231
acauac			Crem_Contig24_20679
acacgu			Crem_Contig24_20677
acguuu			Crem_Contig22_18358
guaauu			Crem_Contig16_9818
gagauu			Crem_Contig16_9816 ,Crem_Contig86_44273
ugaaca			Crem_Contig114_35063
auacuu			Crem_Contig105_22437	Cbre_Contig41_6372
uacugg			Crem_Contig0_226
ugggaa			Crem_Contig0_137
aaaaca				Cbre_Contig31_5173
augccg				Cbre_Contig68_13997
auugua				Cbre_Contig308_33295
caacag				Cbre_Contig21_3575
caaccg				Cbre_Contig21_3579
caauuc				Cbre_Contig77_15952
cauccu				Cbre_Contig30_5137
ccugcc				Cbre_Contig30_5135
cucuaa				Cbre_Contig49_6925
gaggug				Cbre_Contig205_26293
gaucua				Cbre_Contig205_26290 ,Cbre_Contig91_17623
ggaccu				Cbre_Contig154_23694
ggaggu				Cbre_Contig205_26287
gggauu				Cbre_Contig34_5422
guacaa				Cbre_Contig68_13995
guaguc				Cbre_Contig205_26301 ,Cbre_Contig91_17633
gugaug				Cbre_Contig102_18128
uaaguc				Cbre_Contig305_33275 ,Cbre_Contig1313_47422
uacacu				Cbre_Contig23_4305
uagauc				Cbre_Contig81_16151
uauuag				Cbre_Contig0_31
ugauau				Cbre_Contig68_14000
ugccca				Cbre_Contig91_17601
uuucac				Cbre_Contig94_17788
